1 A triad of kicknet sampling, eDNA metabarcoding,  
2 and predictive modeling to assess aquatic  
3 macroinvertebrate biodiversity  
4

5 François Keck<sup>1,\*</sup>, Samuel Hürlemann<sup>1</sup>, Nadine Locher<sup>1</sup>, Christian Stamm<sup>2</sup>, Kristy Deiner<sup>1,3,§</sup>  
6 and Florian Altermatt<sup>1,4,\*,§</sup>  
7

8 <sup>1</sup>Eawag: Swiss Federal Institute of Aquatic Science and Technology, Department of Aquatic  
9 Ecology, Überlandstr. 133, CH-8600 Dübendorf, Switzerland.

10 <sup>2</sup>Eawag: Swiss Federal Institute of Aquatic Science and Technology, Department of  
11 Environmental Chemistry, Überlandstr. 133, CH-8600 Dübendorf, Switzerland.

12 <sup>3</sup>ETH, Department of Environmental Systems Science, Universitätstr. 16, CH-8092 Zürich,  
13 Switzerland

14 <sup>4</sup>Department of Evolutionary Biology and Environmental Studies, University of Zurich,  
15 Winterthurerstr. 190, CH-8057 Zürich, Switzerland.

16

17 corresponding authors: [Francois.Keck@eawag.ch](mailto:Francois.Keck@eawag.ch) and [Florian.Altermatt@eawag.ch](mailto:Florian.Altermatt@eawag.ch)

18 § shared last co-authorship

19

20 Running title : A triad of methods to assess aquatic macroinvertebrate biodiversity

## 21 Abstract

22 Monitoring freshwater biodiversity is essential to understand the impacts of human activities  
23 and for effective management of ecosystems. Thereby, biodiversity can be assessed  
24 through direct collection of targeted organisms, through indirect evidence of their presence  
25 (e.g. signs, environmental DNA, camera trap, etc.), or through extrapolations from species  
26 distribution models (SDM). Differences in approaches used in biodiversity assessment,  
27 however, may come with individual challenges and hinder cross-study comparability. In the  
28 context of rapidly developing techniques, we compared a triad of approaches in order to  
29 understand assessment of aquatic macroinvertebrate biodiversity. Specifically, we compared  
30 the community composition and species richness of three orders of aquatic  
31 macroinvertebrates (mayflies, stoneflies, and caddisflies, hereafter EPT) obtained via eDNA  
32 metabarcoding and via traditional *in situ* kicknet sampling to catchment-level based  
33 predictions of a species distribution model. We used kicknet data from 24 sites in  
34 Switzerland and compared taxonomic lists to those obtained using eDNA amplified with two  
35 different primer sets. Richness detected by these methods was compared to the  
36 independent predictions made by a statistical species distribution model using landscape-  
37 level features to estimate EPT diversity. Despite the ability of eDNA to consistently detect  
38 some EPT species found by traditional sampling, we found important discrepancies in  
39 community composition between the two approaches, particularly at local scale. Overall, the  
40 more specific set of primers, namely fwH2/EPTDr2n, was most efficient for the detection of  
41 target species and for characterizing the diversity of EPT. Moreover, we found that the  
42 species richness measured by eDNA was poorly correlated to the richness measured by  
43 kicknet sampling and that the richness estimated by eDNA and kicknet were poorly  
44 correlated with the prediction of the statistical model. Overall, however, neither eDNA nor the  
45 traditional approach had strong links to the predictive models, indicating inherent limitations  
46 in upscaling species richness estimates. Future challenges include improving the accuracy  
47 and sensitivity of each approach individually yet also acknowledge their respective  
48 limitations, in order to best meet stakeholder demands addressing the biodiversity crisis we  
49 are facing.

## 50 Keywords

51 Metabarcoding, water DNA, Ephemeroptera, Plecoptera, Trichoptera

## 52 Introduction

53 The role of biodiversity in maintaining ecosystem functions and services is widely recognized  
54 (Chapin 2000, Cardinale 2012). Consequently, deleterious effects of human activities on  
55 biodiversity are a source of growing concern and are mobilising both scientists and  
56 stakeholders around the world (Pereira & Cooper 2006, Diaz et al. 2020). In a context where  
57 the loss of biodiversity is established and threatens many of the benefits that ecosystems  
58 provide to humanity, monitoring the diversity and composition of biological communities is a  
59 priority, both to prevent future adverse consequences and to establish possible restoration  
60 measures (Lindenmayer & Likens 2010). However, measuring state and change of  
61 biodiversity remains a challenge both due to questions related to its scientific definition (such  
62 as which levels of biological organisation to study and at what spatial scales) and to the  
63 limitation of the methods and technologies available to monitor life in the environment.

64 For a long time, freshwater biodiversity monitoring has solely relied on the capture of  
65 individuals or their direct observation. These approaches, although improved over time,  
66 remain limited by sampling biases, identification errors, associated costs, and sometimes  
67 coarse taxonomic resolution. Furthermore, they do not allow upscaling and predicting to

68 larger spatial or temporal scales. Thus, additional approaches are needed to complement  
69 classic biodiversity data, especially with respect to a better scaling and resolving the state  
70 and change of biodiversity. Approaches can be based on novel technological advances,  
71 such as in molecular sciences, or in a more detailed use of predictive or other statistical  
72 models (Guisan and Zimmermann 2000; Taberlet et al. 2012; Petchey et al. 2015; Altermatt  
73 et al. 2020). The implementation of these approaches, however, needs to be complemented  
74 with a thorough analysis of strengths and weaknesses, including directly comparing  
75 performance of the approaches as well as identifying what can (or cannot) be gained by  
76 either approach. Within the last decade, environmental DNA (eDNA) has been – especially  
77 in aquatic ecosystems – presented as a game-changer to traditional approaches, with the  
78 promise of being able to monitor biodiversity at unprecedented spatial and temporal scales  
79 (Hering et al., 2018; Leese et al., 2016, Deiner et al. 2017). In streams and rivers, it has also  
80 already been extensively used and compared to classic kicknet-based approaches, and  
81 complementarity and respective advantages and disadvantages have been put forward (e.g.  
82 Mächler et al., 2019, Hänfling et al., 2016, Pont et al. 2018). Several recent meta-analyses  
83 (Keck et al. 2021; McElroy et al. 2020) showed that, in aquatic environments, eDNA  
84 metabarcoding and traditional methods can provide similar estimates of taxonomic richness,  
85 but large inconsistencies remain in the taxonomic composition found by the two approaches,  
86 especially in macroinvertebrate and microbial communities.

87 A pairwise comparison of methods, however, may be hard to resolve, as either method could  
88 be a better approximation of reality. Thus, including a third approach, using a triad of  
89 comparisons (Figure 1), offers the possibility to resolve such discussions, yet hinges on  
90 models that rely on independent and exogenous variables (e.g. environmental variables) to  
91 predict diversity (see e.g. Moraes et al. 2014; Lobo et al. 2004; Lehmann et al. 2002). This  
92 latter approach does not estimate diversity from direct observation but from mathematical  
93 functions or statistical relationships previously established (Ferrier and Guisan 2006). Since  
94 direct observations (traditional or DNA-based) are still very sparse and limited, this third  
95 approach is the only one that currently allows us to estimate biodiversity on a large scale  
96 and in a continuous manner. However, there has been little – if any – work on linking the  
97 estimates obtained by such models (usually trained with traditional observational data) with  
98 those obtained from eDNA.

99 In this study, we used a dataset of 24 streams located in Switzerland, for which  
100 macroinvertebrate communities have been sampled at one location, both by kicknet and  
101 eDNA, and for which independent predictions on species richness have been modelled. We  
102 specifically focus on the diversity of three orders of macroinvertebrates: mayflies  
103 (Ephemeroptera, E), stoneflies (Plecoptera, P), and caddisflies (Trichoptera, T). EPT taxa  
104 are commonly found in streams and rivers, and have proven to be useful and powerful  
105 indicators of water quality (Wallace et al. 1996). We amplified eDNA with two distinct pairs of  
106 primers, a more generic one (mlCOLintF/HCO2198, Leray et al. 2013, Folmer et al. 1994)  
107 and one more specific toward benthic invertebrate taxa (fwhF2/EPTDr2n, Vamos et al. 2017,  
108 Leese et al. 2021), in order to test their respective capacity to unveil EPT diversity. We  
109 compared the diversity estimates and the species composition detected by the eDNA and  
110 kicknet approaches, both at regional (gamma diversity) and local (alpha diversity) scale. We  
111 then related these results to the diversity estimated by a predictive statistical model for EPT  
112 richness (Kaelin and Altermatt 2016). Our goal was to evaluate the ability of this triad of  
113 methods to estimate and characterize the biodiversity in streams, and to investigate their  
114 differences.

## 115 Material and Methods

### 116 Sampling

117 Water samples were collected from 24 streams in Switzerland in 2013–2014 (Figure 2). All  
118 streams were small to medium sized streams (range of catchment area 7 to 66 km<sup>2</sup>) in the  
119 Plateau and Jura part of Switzerland, covering an elevational range from 370 to 912 m a.s.l.  
120 All were headwater streams with no waste water treatment plants upstreams, and land-use  
121 types in the upstream catchment consisted mostly of forest and agriculture (dairy farming  
122 and cropping). Settlements covered between 5 and 21% of the catchment areas. At each  
123 location, we sampled two sites in the stream located a few hundreds meters apart, yet within  
124 the same habitat type and environmental conditions. Macroinvertebrate communities were  
125 sampled using kicknets and water samples were collected for eDNA analyses. Water  
126 samples were transported in a cooler on ice (maximum transport time of six hours) and were  
127 stored at –20 °C until processed further. All samples were taken within a larger research  
128 program (for details of the project and sampling procedure, see also Burdon et al. 2019,  
129 Stamm et al. 2016, 2017). Here we focus on the subset of samples taken upstream of waste  
130 water treatment plant inflows only.

### 131 EPT identification

132 At each location, all individuals of may-, stone-, and caddisflies (EPT) were identified to the  
133 species level (in few cases to pre-defined species complexes, subsequently treated as  
134 species) using expert taxonomists. Identification of all taxa followed pre-defined taxonomic  
135 lists, and all data from the two sites per location were pooled. For details see Burdon et al.  
136 (2019) and Stucki (2010). For subsequent analyses, we only used presence/absence data,  
137 and calculated species richness values per location.

### 138 Water filtration and DNA extraction

139 Methods for filtration and extraction of DNA from water samples were previously published in  
140 Mansfeldt et al. (2020). Briefly, water was filtered through a glass fiber filter (GF/F, nominal  
141 pore size of 0.7 µm, 25 mm, Whatman International Ltd., England) and was extracted with a  
142 Phenol-Chloroform Isoamyl followed by an ethanol precipitation (Mansfeldt et al. 2020).  
143 Strict adherence to contamination control was followed using a controlled lab where only  
144 eDNA isolation and pre-PCR preparations are performed (Deiner et al. 2015). Between two  
145 and eight independent extractions from filters were carried out for each sample location.  
146 Total volume of water filtered for each extraction depended on the suspended solids in the  
147 sample, which clogged the filter, and ranged from 65 to 350 mL. A total of 500 to 700 mL of  
148 filtered water was used per sample for DNA extraction (see Mansfeldt et al. 2020). A 50 µL  
149 pool was created by adding equal volumes from each independent extraction and quantified  
150 using the Qubit (1.0) fluorometer following recommended protocols for the dsDNA HS  
151 Assay, which has a high accuracy for double stranded DNA between 1 ng/mL to 500 ng/mL  
152 (Life Technologies, Carlsbad, CA, USA). Filter negative controls were created for each day  
153 that filtration took place. A filter negative control consisted of filtering 250 mL of Milli-Q®  
154 water that was secondarily decontaminated with UVC light. DNA extraction controls were  
155 used to monitor contamination and processed with each batch of extractions of which  
156 consisted of between 18 and 22 filters per batch (Table SXX: Controls tab). All pooled DNA  
157 extractions were cleaned with the OneStep™ PCR Inhibitor Removal Kit (Zymo Research,  
158 Irvine, California, USA) according to the manufacturer's protocol as this has been shown to  
159 be effective for removal of PCR inhibition of riverine samples of environmental DNA (McKee  
160 et al. 2015).

## 161 Library construction and sequencing

162 Library construction for each sample location followed a three step PCR process. The first  
163 PCR consisted of amplification of a 312 bp fragment of the 5' end of the Cytochrom Oxidase  
164 I mitochondrial gene (COI) using the forward primer (mICOLintF) from Leray et al. (2013) and  
165 the reverse primer (HCO2198) from Folmer et al. (1994). Four independent PCRs on eDNA  
166 were carried out in 15  $\mu$ L volumes with final concentrations of 1x supplied buffer (Faststart  
167 TAQ, Roche, Inc., Basel, Switzerland), 1000 ng/ $\mu$ L BSA (New England Biolabs, Ipswich, MA,  
168 USA), 0.2 mMol dNTPs, 2.0 mMol MgCl<sub>2</sub>, 0.05 units per  $\mu$ L Taq DNA polymerase (Faststart  
169 TAQ, Roche, Inc., Basel, Switzerland), and 0.5  $\mu$ Mol of each forward and reverse primer. 2  
170  $\mu$ L of extracted eDNA was added that ranged in concentration from 0.03 to 54.0 ng/ $\mu$ L. This  
171 range was the outcome of DNA concentrations that were extracted. The thermal-cycling  
172 regime was 95 °C for 4 minutes, followed by 35 cycles of 95 °C for 30 seconds, 48 °C for 30  
173 seconds and 72 °C for 1 minute. A final extension of 72 °C for 5 minutes was carried out and  
174 the PCR was cooled to 4 °C until removed and stored at -20 °C until products were cleaned.  
175 PCR products were visualized on a 1.5% agarose gel to confirm amplification. We cleaned  
176 each PCR replicate with Exo I Nuclease (EXO I) and Shrimp Alkaline Phosphatase (SAP)  
177 (Thermo Fisher Scientific Inc., Waltham, Maryland USA). The master mix consisted of 1.6  
178 U/ $\mu$ L Exo I and 0.15 U/ $\mu$ L SAP in a total volume of 1.1  $\mu$ L which was then added to 7.5  $\mu$ L of  
179 the PCR product. Products were heated to 37 °C for 15 minutes and followed by 15 minutes  
180 at 80 °C for deactivation of EXO and SAP.

181 The second PCR was conducted with the same PCR conditions above except the forward  
182 and reverse primers were modified to include the Nextera® transposase adaptors and only 1  
183  $\mu$ L of cleaned PCR product was used in the reaction. Between the forward and reverse  
184 primer sequence and the transposase adaptor a different number of random bases were  
185 inserted to create products of varying length to allow more heterogeneity on the flow cell.  
186 The thermal-cycling regime was the same except that five cycles were used. PCR products  
187 from the four independent reactions for each sample were then pooled together and cleaned  
188 using a two-step method. First, we cleaned each pooled reaction with EXO I and SAP as  
189 described above except we adjusted proportionally the volumes of EXO I and SAP for a total  
190 cleaned volume of 30  $\mu$ L rather than 7.5  $\mu$ L. Second, we desalted, removed buffer  
191 components with the Illustra MicroSpin S-300 HR Columns (GE Healthcare Life Sciences,  
192 Little Chalfont, United Kingdom) following the manufacturer's recommended protocol.

193 The third PCR was to index each pooled PCR by before pooling all PCR from each site for  
194 sequencing. We dual-indexed samples using the Nextera® index kits A and D. PCR was  
195 carried out in 50  $\mu$ L where samples were added at either 5 or 10  $\mu$ L, where amplicons that  
196 showed a DNA concentration less than 0.1 ng/ $\mu$ L were added at 10  $\mu$ L and all other greater  
197 than this were added at 5  $\mu$ L. We used the KAPA Library Amplification Kit following the  
198 manufacturer's recommended protocol (KAPA Biosystems, Wilmington, MA). Each of the  
199 pooled reactions were then cleaned using Agencourt AMPure XP beads following the  
200 recommended manufacturer's protocol (Beckman Coulter, Brea, CA, USA).

201 Cleaned and indexed libraries were then assayed for DNA concentration using the Qubit  
202 (1.0) fluorometer following recommended protocols for the dsDNA HS Assay, normalized  
203 then pooled at a 2 nM concentration. PHiX control was added at 1%. Paired-end sequencing  
204 was performed on an Illumina MiSeq (MiSeq Reagent kit v2, 250 cycles) at the Genomic  
205 Diversity Center at the ETH, Zurich, Switzerland following manufacturer's run protocols  
206 (Illumina, Inc., San Diego, CA, USA). The MiSeq Control Software Version 2.2 including  
207 MiSeq Reporter 2.2 was used for the primary analysis and the demultiplexing of the raw  
208 reads.

209 In order to amplify the 142 bp long fragment of the COI locus using fwhF2 forward primer  
210 (Vamos et al. 2017) and EPTDr2n reverse primer (Leese et al. 2021) a similar three-step



211 PCR as described above, was conducted. First PCR was carried out in three independent  
212 PCR reactions with a total volume of 25  $\mu$ L containing final concentrations of 1x supplied  
213 buffer (Faststart TAQ, Roche, Inc., Basel, Switzerland), 1500 ng/ $\mu$ L BSA (Molecular biology  
214 grade, New England Biolabs), 0.2 mMol dNTPs, 3.0 mMol MgCl<sub>2</sub>, 0.05 units per  $\mu$ L Taq  
215 DNA polymerase (Faststart TAQ, Roche, Inc., Basel, Switzerland), and 0.5  $\mu$ Mol of each  
216 forward and reverse primer. 2  $\mu$ L of extracted eDNA or PCR grade water as negative control  
217 was added to each reaction. PCR Reactions were performed with the following cycle  
218 settings on a (Biometra T1Thermocycler, Analytik Jena GMBH, Ge): denaturation was at  
219 95°C for 8 minutes, followed by 30 cycles of 95 °C for 30 seconds, 50 °C for 1 minute and  
220 72°C for 1 minute. A final extension of 72 °C for 7 minutes was performed, followed by  
221 lowering the temperature to 4°C to avoid DNA degrading.

222 From the first PCR product, 10  $\mu$ L was enzymatically cleaned by adding 0.11 U/ $\mu$ L  
223 Exonuclease I (E. coli), 0.2 U/ $\mu$ L Shrimp Alkaline Phosphatase (rSAP) (New England  
224 Biolabs) and 1.11  $\mu$ L PCR grade water to each sample. The temperature cycling was carried  
225 out, as recommended by the manufacturer.

226 In order to add the Nextera transposase sequences adaptors to the first PCR fragment, 4  $\mu$ L  
227 cleaned PCR product was used in similar PCR condition as in the first PCR reaction.  
228 Thermal cycling regime was identical, except that the number of cycles were reduced.  
229 Amplification success was checked with the AM320 method on the QiAxcel Screening  
230 Cartridge (Qiagen, Germany). Most of the samples worked after 10 PCR cycles. However,  
231 the cycling number for 28 samples was adjusted up to 18 cycles, in order to see  
232 amplification success.

233 Before we attached the index adapters with the third PCR, additional cleaning steps were  
234 performed. This consisted of first pooling the replicates of the second PCR product and then  
235 running it on a 0.8% low melting point Agarose (Analytical grade, Promega) together with  
236 100-bp ladders (Promega, Madison, WI, USA). Fragments with the correct size of 268 bp  
237 were cutted out from gel, by using a fresh scalpel. Thereafter DNA was purified, using the  
238 Wizard SV Gel and PCR Clean-Up System (Promega, Madison, WI, USA). Excised DNA  
239 bands were dissolved in 250  $\mu$ L Membrane Binding Solution at 65 °C shaken at 850 rpm for  
240 2 minutes. After the column bind and washing steps, DNA was eluted in 20  $\mu$ L PCR grade  
241 water.

242 Illumina Nextera XT Index set D (Illumina, Inc., San Diego, CA, USA) were attached to the  
243 purified amplicon by following the recommended protocol from the Illumina library  
244 preparation guide, except increasing cycle number from 8 to 10 cycles. After the Nextera®  
245 index adapters successfully bound to the fragment, the individual samples were cleaned up  
246 with a MagJET NGS Cleanup and Size Selection Kit running on a KingFisher Flex  
247 Purification System (Thermo Fisher Scientific Inc., MA, USA).

248 Quantification of PCR products was conducted with a target selective fluorescence dye  
249 Qubit BR DNA Assay Kit (Life Technologies, Carlsbad, CA, USA). Fluorescence dye  
250 emission of the standard dilution series and samples were measured in replicates with a  
251 Spark Multimode Microplate Reader (Tecan, US Inc., USA). Samples, including filter,  
252 extraction and PCR controls were then merged in four equimolar pools (3nM), in relation to  
253 their concentration, with an automated liquid handling station (BRAND GMBH + CO KG,  
254 Wertheim, GE). Final pool was then three times manually purified, by using a 0.8x ratio of  
255 Agencourt AMPure XP (Beckman Coulter, Brea, CA, USA) beads, again following the  
256 recommended manufacturer's protocol. Amplicon size was verified by an Agilent 4200  
257 TapeStation (AgilentTechnologies, Inc., USA) run. Library was sequenced with a  
258 concentration of 10 pM in the flowcell on an Illumina MiSeq (Illumina, Inc. San Diego, CA,  
259 USA) at the Genetic Diversity Center (ETH, Zurich). The Sequencing run (MiSeq Reagent kit  
260 v2, 300 cycles, paired-ended) was spiked with 10% PhiX control.

## 261 Bioinformatics

262 The software package DADA2 v.1.16.0 was used to infer amplicon sequence variants  
263 (ASVs) from the demultiplexed MiSeq (forward and reverse) reads following the methods  
264 described by Callahan et al. (2016). Primer sequences (mICOLintF/HCO2198 and  
265 fwHF2/EPTDr2n) were removed from the reads using cutadapt v.2.10 (Martin, 2011). After  
266 primer removal, the forward and reverse reads were truncated to 200 and 170 nucleotides  
267 respectively for the mICOLintF/HCO2198 run, in order to remove poor quality nucleotides at  
268 their extremities. Both the forward and reverse reads were truncated to 120 nucleotides for  
269 the fwHF2/EPTDr2n run. Reads were quality-filtered by removing any read with one or more  
270 ambiguities (“N”) and any read with a maximum expected error (maxEE) larger than 2. After  
271 dereplication, ASVs were finally selected based on the error rates model determined by the  
272 DADA2 denoising algorithm and paired reads merged into one sequence using a minimum  
273 overlap of 12 bases. Potential chimeric sequences were removed using the de novo bimera  
274 detection algorithm implemented in DADA2.

275 We translated the ASV sequences into amino acids starting from the 2nd nucleotide and  
276 using the invertebrate mitochondrial code. Since COI is a coding sequence, it is not  
277 expected to find stop codons in the barcode region. Therefore, all the ASV sequences (2642  
278 for the mICOLintF/HCO2198 primers, 2251 for the fwHF2/EPTDr2n primers) in which a stop  
279 codon was found were discarded. For the mICOLintF/HCO2198 run, a total of 140 additional  
280 ASVs which were found in relative proportion > 0.1% in one of the six negative controls were  
281 also discarded from all the samples. For the fwHF2/EPTDr2n run, only 2 ASV sequences  
282 were removed at this step (2 negative controls were used).

283 Taxonomic assignment of ASV sequences was achieved using the RDP algorithm (Wang et  
284 al. 2007) with a bootstrap threshold of 75%. The reference database used for taxonomic  
285 assignment was assembled from several sources: NCBI, Bold, MIDORI and the EPT  
286 sequences collected within the SwissBOL project. After quality filtering (removing incorrect  
287 sequences and mislabeled taxa) the reference database included 654,132 labeled COI  
288 sequences divided in 88 classes, 493 orders, 4,107 families, 33,337 genera and 120,374  
289 species. Replicates (sites) were merged by locations. For five locations (Buttisholz,  
290 Hochdorf, Hornussen, Messen, and Niederdorf, see Figure 2), only one replicate was  
291 available for mICOLintF/HCO2198. Therefore we excluded the corresponding replicates from  
292 the analysis of fwHF2/EPTDr2n.

## 293 Predictive model for EPT richness

294 For each sampling location, we predicted the EPT species richness using a statistical  
295 species distribution (species richness) model developed by Kaelin and Altermatt (2016), and  
296 model predictions were directly taken from that publication for the respective 24 study  
297 catchments used here. Briefly, this model is a generalized linear model using a Poisson error  
298 distribution. The model was trained to predict EPT species richness from a set of 11  
299 environmental variables using lasso regularization. The model had been trained with a  
300 dataset of 410 independent locations where EPT species richness was assessed by kicknet  
301 sampling. These 410 locations did not overlap with any of the 24 study locations/catchments  
302 herein used, and had been monitored by kicknet in a systematic manner between 2009–  
303 2013, ensuring random spatial and temporal coverage (for details, see Altermatt et al. 2013,  
304 Ryo et al. 2018). These sites cover a much wider environmental, geographic and temporal  
305 scale than the 24 study catchments compared to, thus should encapsulate all variation in  
306 species richness expected in the latter. Then, using generalized linear models incorporating  
307 all main land-use variables identified as relevant by Kaelin & Altermatt (2016), the model  
308 was used to predict species richness in 22,169 ~2 km<sup>2</sup> large sub-catchments, covering the  
309 entire territory of Switzerland. Predictions on alpha diversity (richness) of EPT were retrieved  
310 for the sub-catchments corresponding to the 24 locations studied here. Thus, the predictive

311 species distribution model made predictions on the expected richness in the 24 study  
312 catchments further analysed here are based on a model parametrized across all of  
313 Switzerland. We note that the data used to train the predictive model are also based on  
314 kicknet samples. That is, there may be an inherent part of diversity only detectable by eDNA  
315 that cannot be assessed by the kicknet method, which would thus also not be covered by the  
316 model. Importantly, however, the model makes only predictions at the level of total richness,  
317 and not at the level of individual species' identity. Thus, predictions are at a coarser level,  
318 such that this effect is not expected to play a major role, or maximally result in a shift in the  
319 intercept of richness predictions.

## 320 Analyses

321 We used presence-absence data and species richness (i.e. the number of species) to  
322 characterize the diversity of EPT, both from the eDNA as well as the kicknet data. Diversity  
323 was studied both at local scale (i.e. locations after merging site replicates, alpha diversity),  
324 and at regional scale (i.e. all locations merged, gamma diversity). For both alpha and  
325 gamma diversity, we compared the number of species detected by kicknet only, by eDNA  
326 only, and by the two approaches simultaneously. For each location, the sampling effort  
327 (number of identified individuals and sequencing depth) was assessed with species  
328 accumulation curves. Finally, we computed and tested Pearson correlations between the  
329 richness found by eDNA (fwhF2/EPTDr2n and mlCOLintF/HCO2198 primers separately),  
330 found by kicknet and estimated by the predictive model. Analyses were conducted using R  
331 4.0.3 (R Core Team, 2020).

## 332 Data and code

333 All raw sequencing data are available at the European Nucleotide Archive (ENA) under the  
334 accession number PRJEB26649. The processed data and R scripts to reproduce the  
335 analyses and results are available at : <https://github.com/fkeck/ecoimpact>.

## 336 Results

337 Library sequencing generated 4,638,809 sequences (mlCOLintF/HCO2198 primers) and  
338 8,008,677 sequences (fwhF2/EPTDr2n primers). For sequences amplified using the  
339 mlCOLintF/HCO2198 primers, the pre-processed and quality-filtered data consists of  
340 3,110,057 reads divided in 13,797 ASVs. For sequences amplified using the fwhF2/EPTDr2n  
341 primers, the pre-processed and quality-filtered data consists of 4,779,863 reads divided in  
342 2,665 ASVs.

343 For the mlCOLintF/HCO2198 primers, taxonomic assignment failed for a significant number  
344 of ASVs for which identification was not possible, even at the highest taxonomic ranks (87%  
345 of unclassified Eukaryota). Assigned reads are dominated by insects (Diptera, Coleoptera  
346 and unclassified Insecta), Clitellata, Chromadorea and unclassified arthropods. The orders  
347 of interest (EPT) only represent a small proportion of assigned ASVs (7%), with 32  
348 Ephemeroptera, 17 Plecoptera and 34 Trichoptera taxa detected. The relative proportion of  
349 EPT is even less important when accounting for the number of reads. In total the EPT  
350 groups represent 3.1% of the assigned reads. In contrast, the fwhF2/EPTDr2n primers  
351 performed better with a lower proportion of unidentified Eukaryota (47.9%). Targeted orders  
352 were also more represented with 63 ASVs identified as Ephemeroptera, 37 as Plecoptera,  
353 and 42 as Trichoptera taxa, representing 10% of the assigned ASVs (8.6% of the assigned  
354 reads). The sampling depth (number of reads identified as EPT) was highly variable among  
355 locations (ranging from 7 at Aadorf with mlCOLintF/HCO2198 to 109,956 at Zullwil with  
356 fwhF2/EPTDr2n). The absolute number of reads identified as EPT was 10 to 100 times



357 higher with the fwhF2/EPTDr2n primers than with the mICOLintF/HCO2198 primers  
358 (Supplementary Information Figure 1 and 2). In one location (Hornussen) none of the tested  
359 primers could detect EPT taxa. However, all the species accumulation curves seem to reach  
360 a plateau in the other locations (Supplementary Information Figure 1 and 2). This was not  
361 the case with the kicknet data (Supplementary Information Figure 3).

362 Across all sites (i.e., gamma diversity), kicknet was the method that detected the highest  
363 number of different EPT taxa (64), followed by eDNA amplified with the fwhF2/EPTDr2n  
364 primers (44 taxa). Results of the regional EPT species richness (across all locations) are  
365 shown on Figure 3. Environmental DNA amplified by the mICOLintF/HCO2198 primers  
366 detected only 28 taxa across all sites. In total, 16 taxa were detected by the three methods.  
367 We found a better congruence between the fwhF2/EPTDr2n primers and the kicknet (32  
368 common taxa) than between the mICOLintF/HCO2198 primers and the kicknet (21 common  
369 taxa), or between the two primers (21 common taxa).

370 The number of EPT taxa detected varied both across locations and methods (Figure 4).  
371 Additionally, the mICOLintF/HCO2198 primers did not detect any EPT taxa in three other  
372 locations (Buttisholz, Knonau and Rothenthurm). Some locations showed particularly poor  
373 diversity (e.g. Colombey, Val de Ruz), while others exhibited a high EPT richness (e.g.  
374 Rothenthurm when assessed with the fwhF2/EPTDr2n primers). Overall, alpha diversity  
375 (local species richness) was higher with kicknet (mean = 19.6, sd = 6.5) than with eDNA  
376 amplified with mICOLintF/HCO2198 primers (mean = 4.37, sd = 3.85) or fwhF2/EPTDr2n  
377 primers (mean = 7, sd = 7.88). The mean richness detected by the fwhF2/EPTDr2n primers  
378 was not significantly higher than the mean richness detected by the mICOLintF/HCO2198  
379 primers (paired t-test,  $t = -1.48$ ,  $p\text{-value} = 0.15$ ).

380 Some taxa commonly detected by kicknet sampling were never or rarely detected by eDNA  
381 (Figure 5). For example, this is the case for *Alainites muticus*, *Centroptilum luteolum*,  
382 *Habrophlebia lauta* or the genus *Hydropsyche*. Contrastingly, the very common species  
383 *Baetis rhodani* was well detected by both approaches. There is no common species  
384 detected systematically by eDNA that is not detected by the traditional sampling. However, a  
385 few species were detected only by eDNA in a few streams (e.g. *Glyptotaelius pellucidus*,  
386 *Nemurella pictetii*, and the *Hydroptila*-complex).

387 We found the correlation between the richness estimates provided by the different methods  
388 to be remarkably low (Figure 6). The highest correlation ( $\rho = 0.44$ ,  $p\text{-value} = 0.03$ ) was  
389 found between the predictive model and eDNA amplified with the fwhF2/EPTDr2n primers.  
390 Correlations between the kicknet method and the predictive model ( $\rho = 0.3$ ,  $p\text{-value} =$   
391  $0.16$ ) and between the kicknet method and the fwhF2/EPTDr2n primers ( $\rho = 0.27$ ,  $p\text{-value}$   
392  $= 0.2$ ) were not significant. The correlations between the mICOLintF/HCO2198 primers and  
393 the other approaches were close to zero and non-significant (Figure 6). Merging the primers  
394 did not improve the correlations between the richness found by eDNA and the other methods  
395 (Supplementary Information Figure 4).

## 396 Discussion

397 The study of diversity on a regional scale (gamma diversity) shows the ability of  
398 environmental DNA to detect many taxa also identified by the traditional kicknet method.  
399 This result is in line with previous studies which reported several EPT taxa detected by both  
400 methods (Mächler et al. 2019, Seymour et al. 2021). However, a significant number of taxa  
401 known to be present in these rivers (according to the kicknet sampling) could not be  
402 detected by either the mICOLintF/HCO2198 or fwhF2/EPTDr2n primers. In total, 23 EPT  
403 species were detected by kicknet and were not detected by either primer set. The non-  
404 congruence between kicknet and the eDNA methods is even more pronounced when results  
405 are assessed at local scale (alpha diversity). This result is not surprising, as pooling species

406 information from multiple locations together across a region is likely to increase the set of  
407 species detected by both methods. It has been, however, a common practice in  
408 metabarcoding studies to perform comparisons at regional level (i.e. gamma diversity),  
409 which probably contributed to a misleading idea that eDNA and traditional methods are  
410 generally congruent. A recent meta-analysis showed, on the contrary, the low congruence  
411 between species list generated by DNA metabarcoding and traditional methods for  
412 macroinvertebrates (Keck et al. 2021). Thus, while numbers of diversity reported may be  
413 similar, the identity of taxa found by each method can substantially differ.

414 Overall, we observed a low correlation between the diversity measures estimated by the  
415 triad of different tested methods (kicknet, eDNA and model predictions). The highest  
416 correlation was found between eDNA (fwhF2/EPTDr2n primers) and the predictive model.  
417 This relationship might be to some degree driven by the fact that both methods reflect  
418 diversity at catchment scale as eDNA integrates to some point EPT diversity at the  
419 catchment level (Deiner et al. 2016) and the model estimates EPT diversity from multiple  
420 variables, catchment-wise (Kaelin and Altermatt 2016). The low correlations observed  
421 between the diversity measures estimated by the different methods can largely be explained  
422 by the methodological biases discussed above. It should also be noted that the locations  
423 studied have been sampled across a relatively limited gradient in river size (all were small to  
424 mid sized rivers), all between 370 to 912 m a.s.l. Therefore, the expected variation in the  
425 number of EPT species is limited and this reduces our ability to detect statistical  
426 relationships between the different methods. However, the variability in land-use in the  
427 catchments was relatively pronounced, such that arable land ranged between 0.1 and 81%,  
428 urban areas between 5 and 21%, and grassland between 4 and 54%. The main goal of our  
429 study, namely to use independent model predictions from a species distribution model  
430 (Kaelin & Altermatt 2016) to evaluate the accuracy of kicknet vs. eDNA approaches through  
431 a third, independent approach was only partially successful: indeed, the triad of approaches  
432 gave a triad of partially congruent and partially complementary results. The low congruence  
433 between the species detected by eDNA and kicknet can be explained by the numerous  
434 biases that can influence species detection probabilities at every step of data collection. For  
435 eDNA this can be caused by the complex dynamics of DNA in the environment (release rate  
436 by the organisms, degradation and dilution), manipulation of the DNA in the lab  
437 (conservation, extraction, PCR-amplification, sequencing), and the bioinformatics processing  
438 (Deiner et al. 2017). For the traditional methods, possible biases may concern sampling  
439 representativity (Larras and Usseglio-Polatera 2020) and taxonomic identification, including  
440 both errors and lack of precision (Stribling et al. 2008). However, the respective role of these  
441 factors remains difficult to disentangle and to estimate.

442 One of the reasons often cited to explain the non-detection of taxa by DNA methods is the  
443 incompleteness of reference databases (Weigand et al. 2019). This argument, although  
444 difficult to evaluate, is perfectly valid in studies dealing with the diversity of large or poorly  
445 known taxonomic groups (Lindeque et al. 2013). In the present study, this hypothesis can be  
446 excluded as all species detected by kicknet (except one) are present in the reference  
447 database used. However, this does not guarantee that the amplified regions can resolve all  
448 species detected by kicknet, nor that the intra-specific diversity of these species is fully  
449 represented in our reference database.

450 It should be noted that the choice of the primers and the barcode region to be amplified  
451 seems to play a significant role here. Overall, we found that fwhF2/EPTDr2n primers  
452 detected more EPT taxa than the mICOLintF/HCO2198 primers. It appears that the taxa  
453 detected by the mICOLintF/HCO2198 primers are in majority nested within the pool of taxa  
454 detected by the fwhF2/EPTDr2n primers, which is not surprising given that they are both  
455 amplifying a region of the same marker (COI). Hence our results confirm that for a group of  
456 organisms like the EPT, primer performance changes the detection rate on the exact same  
457 extracted eDNA sample. The fwhF2/EPTDr2n primers do have a higher target to non-target

458 ratio for EPT compared to mlCOLintF/HCO2198 primers (but see Leese et al. 2021 for  
459 results and discussion for all benthic macroinvertebrates).

460 The fact that the more specific primers outperformed the less specific ones raises another  
461 important question: how many EPT species could not be correctly detected by the  
462 fwHf2/EPTDr2n primers because of their lack of specificity? It should be remembered that  
463 these primers, although more specific than the mlCOLintF/HCO2198 primers, cover a  
464 paraphyletic and very large group of organisms (basically, all insects, of which EPT make  
465 only a small percentage). Therefore, gains in the number of species detected by eDNA could  
466 be expected by using markers and primers specific to these three polyphyletic groups.

467 The large number of taxa detected only by the kicknet method should not mask the  
468 existence of several taxa that were detected only by their DNA. This result highlights the fact  
469 that DNA can provide real added value to traditional sampling techniques (Sweeney et al.  
470 2011). The presence of these taxa can be explained on the one hand by the integrative  
471 aspect of environmental DNA, which reflects diversity on a larger scale via transport of DNA  
472 from upstream to downstream of the watershed (Deiner & Altermatt, 2014), and on the other  
473 hand by the capacity of DNA to identify species that are sometimes difficult to collect or  
474 identify using morphological criteria (Haase et al. 2006, Stribling et al. 2008).

475 In conclusion, our results suggest that the three approaches investigated here can give very  
476 different results about the species richness and the species composition of EPT  
477 communities. These differences are due to the respective biases of each method, but also to  
478 the different scales that they integrate. Kicknet sampling is carried out at one point and  
479 captures the organisms physically present at that location. In contrast, models typically  
480 provide estimates of macroinvertebrate diversity on a regular grid or at catchment level  
481 (Ferrier and Guisan 2006). Finally, environmental DNA is sampled at one point but has the  
482 characteristic of being transported from upstream to downstream, thus integrating diversity  
483 at the catchment scale (Deiner & Altermatt, 2014; Deiner et al. 2016). Therefore, although a  
484 certain degree of congruence is expected between the estimates produced by these  
485 methods, their different nature (observation vs. modelling) and the scales they incorporate  
486 can produce variable results, as shown here. Importantly, new frameworks integrating  
487 hydrological transport dynamics of eDNA allow to derive higher resolution diversity  
488 predictions and may act as a bridge between these methods (Carraro et al. 2020), yet have  
489 hitherto only been applied to catchments/scales larger than studied here. More efforts are  
490 needed to understand the reason why we observe such differences and additional work is  
491 needed to improve compatibility and comparability between them. However the achievable  
492 congruence between these approaches is currently limited as each comes with its own  
493 specificities, strengths and weaknesses. On the one hand, kicknet sampling and  
494 morphological identification and modeling are not likely to see major advancements that  
495 would change the outcome of our analysis. Whereas on the other hand, analysis of eDNA for  
496 macroinvertebrates still suffers from major drawbacks due to their paraphyletic origin and  
497 difficulty to exclude non-target groups during genetic analysis. Thus eDNA metabarcoding  
498 has the greatest potential for advancement through further method development and  
499 research. Here we showed that simply by changing primer sequences we could already  
500 improve correlation with the model. Regardless, until this challenge is solved, the three  
501 methods provide different perspectives on biological diversity and should be used together to  
502 provide complementary information to make informed decisions related to biodiversity  
503 management and conservation.

## 504 Acknowledgements

505 We thank Marta Reyes for help during field work, Francis J. Burdon and Rik Eggen for  
506 comments on the project and coordination, and Pascal Stucki for sampling and identification

507 of the EPT taxa. This work has been funded by the Swiss Federal Office for the Environment  
508 (BAFU/FOEN) and is part of the Eawag Ecoimpact initiative. Further funding is from The  
509 Swiss National Science Foundation (grant nr. [31003A\\_173074](https://doi.org/10.13039/501100011033/A173074)), the University of Zurich  
510 Research Priority Programme in Global Change and Biodiversity (URPP GCB) to FA and the  
511 European Research Council (ERC) under the European Union's Horizon 2020 research and  
512 innovation programme (Grant agreement No. 852621) to KD.

## 513 References

- 514 Altermatt F, Seymour M, Martinez N (2013) River network properties shape  $\alpha$ -diversity and  
515 community similarity patterns of aquatic insect communities across major drainage basins.  
516 *Journal of Biogeography* 40: 2249–2260. <https://doi.org/10.1111/jbi.12178>
- 517 Altermatt F, Little CJ, Mächler E, Wang S, Zhang X, Blackman RC (2020) Uncovering the  
518 complete biodiversity structure in spatial networks: the example of riverine systems. *Oikos*  
519 129: 607–618. <https://doi.org/10.1111/oik.06806>
- 520 Burdon FJ, Munz NA, Reyes M, Focks A, Joss A, Räsänen K, Altermatt F, Eggen RIL,  
521 Stamm C (2019) Agriculture versus wastewater pollution as drivers of macroinvertebrate  
522 community structure in streams. *Science of The Total Environment* 659: 1256–1265.  
523 <https://doi.org/10.1016/j.scitotenv.2018.12.372>
- 524 Callahan BJ, McMurdie PJ, Rosen MJ, Han AW, Johnson AJA, Holmes SP (2016) DADA2:  
525 High-resolution sample inference from Illumina amplicon data. *Nature Methods* 13: 581–583.  
526 <https://doi.org/10.1038/nmeth.3869>
- 527 Cardinale BJ, Duffy JE, Gonzalez A, Hooper DU, Perrings C, Venail P, Narwani A, Mace  
528 GM, Tilman D, Wardle DA, Kinzig AP, Daily GC, Loreau M, Grace JB, Larigauderie A,  
529 Srivastava DS, Naeem S (2012) Biodiversity loss and its impact on humanity. *Nature* 486:  
530 59–67. <https://doi.org/10.1038/nature11148>
- 531 Carraro L, Mächler E, Wüthrich R, Altermatt F (2020) Environmental DNA allows upscaling  
532 spatial patterns of biodiversity in freshwater ecosystems. *Nature Communications*, 11: 3585.  
533 <https://doi.org/10.1038/s41467-020-17337-8>
- 534 Chapin III FS, Zavaleta ES, Eviner VT, Naylor RL, Vitousek PM, Reynolds HL, Hooper DU,  
535 Lavorel S, Sala OE, Hobbie SE, Mack MC, Díaz S (2000) Consequences of changing  
536 biodiversity. *Nature* 405: 234–242. <https://doi.org/10.1038/35012241>
- 537 Deiner K, Altermatt F (2014) Transport Distance of Invertebrate Environmental DNA in a  
538 Natural River. *PLOS ONE* 9: e88786. <https://doi.org/10.1371/journal.pone.0088786>
- 539 Deiner K, Walser J-C, Mächler E, Altermatt F (2015) Choice of capture and extraction  
540 methods affect detection of freshwater biodiversity from environmental DNA. *Biological*  
541 *Conservation* 183: 53–63. <https://doi.org/10.1016/j.biocon.2014.11.018>
- 542 Deiner K, Fronhofer EA, Mächler E, Walser J-C, Altermatt F (2016) Environmental DNA  
543 reveals that rivers are conveyor belts of biodiversity information. *Nature Communications* 7:  
544 12544. <https://doi.org/10.1038/ncomms12544>
- 545 Deiner K, Bik HM, Mächler E, Seymour M, Lacoursière-Roussel A, Altermatt F, Creer S,  
546 Bista I, Lodge DM, Vere N de, Pfrender ME, Bernatchez L (2017) Environmental DNA  
547 metabarcoding: Transforming how we survey animal and plant communities. *Molecular*  
548 *Ecology* 26: 5872–5895. <https://doi.org/10.1111/mec.14350>



- 549 Díaz S, Zafra-Calvo N, Purvis A, Verburg PH, Obura D, Leadley P, Chaplin-Kramer R, De  
550 Meester L, Dulloo E, Martín-López B, Shaw MR, Visconti P, Broadgate W, Bruford MW,  
551 Burgess ND, Cavender-Bares J, DeClerck F, Fernández-Palacios JM, Garibaldi LA, Hill SLL,  
552 Isbell F, Khoury CK, Krug CB, Liu J, Maron M, McGowan PJK, Pereira HM, Reyes-García V,  
553 Rocha J, Rondinini C, Shannon L, Shin Y-J, Snelgrove PVR, Spehn EM, Strassburg B,  
554 Subramanian SM, Tewksbury JJ, Watson JEM, Zanne AE (2020) Set ambitious goals for  
555 biodiversity and sustainability. *Science* 370: 411–413.  
556 <https://doi.org/10.1126/science.abe1530>
- 557 Elbrecht V, Vamos EE, Meissner K, Aroviita J, Leese F (2017) Assessing strengths and  
558 weaknesses of DNA metabarcoding-based macroinvertebrate identification for routine  
559 stream monitoring. Yu D (Ed.). *Methods in Ecology and Evolution* 8: 1265–1275.  
560 <https://doi.org/10.1111/2041-210X.12789>
- 561 Ferrier S, Guisan A (2006) Spatial modelling of biodiversity at the community level. *Journal*  
562 *of Applied Ecology* 43: 393–404. <https://doi.org/10.1111/j.1365-2664.2006.01149.x>
- 563 Folmer O, Black M, Hoeh W, Lutz R, Vrijenhoek R (1994) DNA primers for amplification of  
564 mitochondrial cytochrome c oxidase subunit I from diverse metazoan invertebrates.  
565 *Molecular Marine Biology and Biotechnology* 3: 294–9.
- 566 Guisan A, Zimmermann NE (2000) Predictive habitat distribution models in ecology.  
567 *Ecological Modelling* 135: 147–186. [https://doi.org/10.1016/S0304-3800\(00\)00354-9](https://doi.org/10.1016/S0304-3800(00)00354-9)
- 568 Haase P, Murray-Bligh J, Lohse S, Pauls S, Sundermann A, Gunn R, Clarke R (2006)  
569 Assessing the impact of errors in sorting and identifying macroinvertebrate samples. In:  
570 Furse MT, Hering D, Brabec K, Buffagni A, Sandin L, Verdonschot PFM (Eds), *The*  
571 *Ecological Status of European Rivers: Evaluation and Intercalibration of Assessment*  
572 *Methods. Developments in Hydrobiology*. Springer Netherlands, Dordrecht, 505–521.  
573 [https://doi.org/10.1007/978-1-4020-5493-8\\_34](https://doi.org/10.1007/978-1-4020-5493-8_34)
- 574 Hänfling B, Lawson Handley L, Read DS, Hahn C, Li J, Nichols P, Blackman RC, Oliver A,  
575 Winfield IJ (2016) Environmental DNA metabarcoding of lake fish communities reflects long-  
576 term data from established survey methods. *Molecular Ecology* 25: 3101–3119.  
577 <https://doi.org/10.1111/mec.13660>
- 578 Hering D, Borja A, Jones JI, Pont D, Boets P, Bouchez A, Bruce K, Drakare S, Hänfling B,  
579 Kahlert M, Leese F, Meissner K, Mergen P, Reyjol Y, Segurado P, Vogler A, Kelly M (2018)  
580 Implementation options for DNA-based identification into ecological status assessment  
581 under the European Water Framework Directive. *Water Research* 138: 192–205.  
582 <https://doi.org/10.1016/j.watres.2018.03.003>
- 583 Kaelin K, Altermatt F (2016) Landscape-level predictions of diversity in river networks reveal  
584 opposing patterns for different groups of macroinvertebrates. *Aquatic Ecology* 50: 283–295.  
585 <https://doi.org/10.1007/s10452-016-9576-1>
- 586 Keck F, Blackman RC, Bossart R, Brantschen J, Couton M, Hürlemann S, Kirschner D,  
587 Locher N, Zhang H, Altermatt F (2021) Meta-analysis shows both congruence and  
588 complementarity of DNA metabarcoding to traditional methods for biological community  
589 assessment. 2021.06.29.450286pp. <https://doi.org/10.1101/2021.06.29.450286>
- 590 Larras F, Usseglio-Polatera P (2020) Heterogeneity in macroinvertebrate sampling strategy  
591 introduces variability in community characterization and stream trait-based biomonitoring:  
592 Influence of sampling effort and habitat selection criteria. *Ecological Indicators* 119: 106758.  
593 <https://doi.org/10.1016/j.ecolind.2020.106758>



- 594 Leese F, Sander M, Buchner D, Elbrecht V, Haase P, Zizka VMA (2021) Improved  
595 freshwater macroinvertebrate detection from environmental DNA through minimized  
596 nontarget amplification. *Environmental DNA* 3: 261–276. <https://doi.org/10.1002/edn3.177>
- 597 Leese F, Altermatt F, Bouchez A, Ekrem T, Hering D, Meissner K, Mergen P, Pawlowski J,  
598 Piggott J, Rimet F, Steinke D, Taberlet P, Weigand A, Abarenkov K, Beja P, Bervoets L,  
599 Björnsdóttir S, Boets P, Boggero A, Bones A, Borja Á, Bruce K, Bursić V, Carlsson J,  
600 Čiampor F, Čiamporová-Zatovičová Z, Coissac E, Costa F, Costache M, Creer S, Csabai Z,  
601 Deiner K, DelValls Á, Drakare S, Duarte S, Eleršek T, Fazi S, Fišer C, Flot J-F, Fonseca V,  
602 Fontaneto D, Grabowski M, Graf W, Guðbrandsson J, Hellström M, Hershkovitz Y,  
603 Hollingsworth P, Japoshvili B, Jones J, Kahlert M, Stroil BK, Kasapidis P, Kelly M, Kelly-  
604 Quinn M, Keskin E, Kõljalg U, Ljubešić Z, Maček I, Mächler E, Mahon A, Marečková M,  
605 Mejdandzic M, Mircheva G, Montagna M, Moritz C, Mulk V, Naumoski A, Navodaru I,  
606 Padisák J, Pálsson S, Panksep K, Penev L, Petrusek A, Pfannkuchen M, Primmer C,  
607 Rinkevich B, Rotter A, Schmidt-Kloiber A, Segurado P, Speksnijder A, Stoev P, Strand M,  
608 Šulčius S, Sundberg P, Traugott M, Tsigenopoulos C, Turon X, Valentini A, Hoorn B van der,  
609 Várbíró G, Hadjilyra MV, Viguri J, Vitonytė I, Vogler A, Vrålstad T, Wägele W, Wenne R,  
610 Winding A, Woodward G, Zegura B, Zimmermann J (2016) DNAqua-Net: Developing new  
611 genetic tools for bioassessment and monitoring of aquatic ecosystems in Europe. *Research*  
612 *Ideas and Outcomes* 2: e11321. <https://doi.org/10.3897/rio.2.e11321>
- 613 Lehmann A, Leathwick JR, Overton JMcC (2002) Assessing New Zealand fern diversity from  
614 spatial predictions of species assemblages. *Biodiversity & Conservation* 11: 2217–2238.  
615 <https://doi.org/10.1023/A:1021398729516>
- 616 Leray M, Yang JY, Meyer CP, Mills SC, Agudelo N, Ranwez V, Boehm JT, Machida RJ  
617 (2013) A new versatile primer set targeting a short fragment of the mitochondrial COI region  
618 for metabarcoding metazoan diversity: application for characterizing coral reef fish gut  
619 contents. *Frontiers in Zoology* 10: 34. <https://doi.org/10.1186/1742-9994-10-34>
- 620 Lindenmayer DB, Likens GE (2010) The science and application of ecological monitoring.  
621 *Biological Conservation* 143: 1317–1328. <https://doi.org/10.1016/j.biocon.2010.02.013>
- 622 Lindeque PK, Parry HE, Harmer RA, Somerfield PJ, Atkinson A (2013) Next Generation  
623 Sequencing Reveals the Hidden Diversity of Zooplankton Assemblages. *PLOS ONE* 8:  
624 e81327. <https://doi.org/10.1371/journal.pone.0081327>
- 625 Lobo JM, Jay-Robert P, Lumaret J-P (2004) Modelling the species richness distribution for  
626 French Aphodiidae (Coleoptera, Scarabaeoidea). *Ecography* 27: 145–156.  
627 <https://doi.org/10.1111/j.0906-7590.2004.03609.x>
- 628 Mächler E, Little CJ, Wüthrich R, Alther R, Fronhofer EA, Gounand I, Harvey E, Hürlemann  
629 S, Walser J-C, Altermatt F (2019) Assessing different components of diversity across a river  
630 network using eDNA. *Environmental DNA* 1: 290–301. <https://doi.org/10.1002/edn3.33>
- 631 Mansfeldt C, Deiner K, Mächler E, Fenner K, Eggen RIL, Stamm C, Schönenberger U,  
632 Walser J-C, Altermatt, F (2020) Microbial community shifts in streams receiving treated  
633 wastewater effluent. *Science of The Total Environment*, 709: 135727.  
634 <https://doi.org/10.1016/j.scitotenv.2019.135727>
- 635 Martin M (2011) Cutadapt removes adapter sequences from high-throughput sequencing  
636 reads. *EMBnet.journal* 17: 10–12. <https://doi.org/10.14806/ej.17.1.200>
- 637 McElroy ME, Dressler TL, Titcomb GC, Wilson EA, Deiner K, Dudley TL, Eliason EJ, Evans  
638 NT, Gaines SD, Lafferty KD, Lamberti GA, Li Y, Lodge DM, Love MS, Mahon AR, Pfrender  
639 ME, Renshaw MA, Selkoe KA, Jerde CL (2020) Calibrating Environmental DNA

- 640 Metabarcoding to Conventional Surveys for Measuring Fish Species Richness. *Frontiers in*  
641 *Ecology and Evolution* 8: 276. <https://doi.org/10.3389/fevo.2020.00276>
- 642 McKee AM, Spear SF, Pierson TW (2015) The effect of dilution and the use of a post-  
643 extraction nucleic acid purification column on the accuracy, precision, and inhibition of  
644 environmental DNA samples. *Biological Conservation* 183: 70–76.  
645 <https://doi.org/10.1016/j.biocon.2014.11.031>
- 646 Moraes MR, Ríos-Uzeda B, Moreno LR, Huanca-Huarachi G, Larrea-Alcázar D (2014) Using  
647 Potential Distribution Models for Patterns of Species Richness, Endemism, and  
648 Phytogeography of Palm Species in Bolivia. *Tropical Conservation Science* 7: 45–60.  
649 <https://doi.org/10.1177/194008291400700109>
- 650 Pereira HM, Cooper DH (2006) Towards the global monitoring of biodiversity change.  
651 *Trends in Ecology & Evolution* 21: 123–129. <https://doi.org/10.1016/j.tree.2005.10.015>
- 652 Petchey OL, Pontarp M, Massie TM, Kéfi S, Ozgul A, Weilenmann M, Palamara GM,  
653 Altermatt F, Matthews B, Levine JM, Childs DZ, McGill BJ, Schaepman ME, Schmid B,  
654 Spaak P, Beckerman AP, Pennekamp F, Pearse IS (2015) The ecological forecast horizon,  
655 and examples of its uses and determinants. *Ecology Letters* 18: 597–611.  
656 <https://doi.org/10.1111/ele.12443>
- 657 Pont D, Rocle M, Valentini A, Civade R, Jean P, Maire A, Roset N, Schabuss M, Zornig H,  
658 Dejean T (2018) Environmental DNA reveals quantitative patterns of fish biodiversity in large  
659 rivers despite its downstream transportation. *Scientific Reports* 8: 10361.  
660 <https://doi.org/10.1038/s41598-018-28424-8>
- 661 R Core Team (2020) R: A Language and Environment for Statistical Computing. R  
662 Foundation for Statistical Computing, Vienna, Austria. Available from: [https://www.R-](https://www.R-project.org/)  
663 [project.org/](https://www.R-project.org/).
- 664 Ryo M, Harvey E, Robinson CT, Altermatt F (2018) Nonlinear higher order abiotic  
665 interactions explain riverine biodiversity. *Journal of Biogeography* 45: 628–639.  
666 <https://doi.org/10.1111/jbi.13164>
- 667 Seymour M, Edwards FK, Cosby BJ, Bista I, Scarlett PM, Brailsford FL, Glanville HC, de  
668 Bruyn M, Carvalho GR, Creer S (2021) Environmental DNA provides higher resolution  
669 assessment of riverine biodiversity and ecosystem function via spatio-temporal nestedness  
670 and turnover partitioning. *Communications Biology* 4: 1–12. [https://doi.org/10.1038/s42003-](https://doi.org/10.1038/s42003-021-02031-2)  
671 [021-02031-2](https://doi.org/10.1038/s42003-021-02031-2)
- 672 Stamm C, Räsänen K, Burdon FJ, Altermatt F, Jokela J, Joss A, Ackermann M, Eggen RIL  
673 (2016) Unravelling the Impacts of Micropollutants in Aquatic Ecosystems: Interdisciplinary  
674 Studies at the Interface of Large-Scale Ecology. In: Dumbrell AJ, Kordas RL, Woodward G  
675 (Eds), *Advances in Ecological Research. Large-Scale Ecology: Model Systems to Global*  
676 *Perspectives*. Academic Press, 183–223.
- 677 Stamm C, Burdon F, Fischer S, Kienle EC, Munz NA, Tlili A, Altermatt F, Behra R,  
678 Bürgmann H, Joss A, Räsänen K, Eggen RIL (2017) Einfluss von Mikroverunreinigungen.  
679 *Aqua & Gas*, 6 17: 90–95.
- 680 Stribling JB, Pavlik KL, Holdsworth SM, Leppo EW (2008) Data quality, performance, and  
681 uncertainty in taxonomic identification for biological assessments. *Journal of the North*  
682 *American Benthological Society* 27: 906–919. <https://doi.org/10.1899/07-175.1>
- 683 Stucki P (2010) Methoden zur Untersuchung und Beurteilung der Fliessgewässer:  
684 Makrozoobenthos Stufe F. *Umwelt-Vollzug* 1026. BAFU, Bern. 61 pp.

- 685 Sweeney BW, Battle JM, Jackson JK, Dapkey T (2011) Can DNA barcodes of stream  
686 macroinvertebrates improve descriptions of community structure and water quality? *Journal*  
687 *of the North American Benthological Society* 30: 195–216. <https://doi.org/10.1899/10-016.1>
- 688 Taberlet P, Coissac E, Hajibabaei M, Rieseberg LH (2012) Environmental DNA. *Molecular*  
689 *Ecology* 21: 1789–1793. <https://doi.org/10.1111/j.1365-294X.2012.05542.x>
- 690 Vamos E, Elbrecht V, Leese F (2017) Short COI markers for freshwater macroinvertebrate  
691 metabarcoding. *Metabarcoding and Metagenomics* 1: e14625.  
692 <https://doi.org/10.3897/mbmg.1.14625>
- 693 Wallace JB, Grubaugh JW, Whiles MR (1996) Biotic Indices and Stream Ecosystem  
694 Processes: Results from an Experimental Study. *Ecological Applications* 6: 140–151.  
695 <https://doi.org/10.2307/2269560>
- 696 Wang Q, Garrity GM, Tiedje JM, Cole JR (2007) Naïve Bayesian Classifier for Rapid  
697 Assignment of rRNA Sequences into the New Bacterial Taxonomy. *Applied and*  
698 *Environmental Microbiology* 73: 5261–5267. <https://doi.org/10.1128/AEM.00062-07>
- 699 Weigand H, Beermann AJ, Čiampor F, Costa FO, Csabai Z, Duarte S, Geiger MF,  
700 Grabowski M, Rimet F, Rulik B, Strand M, Szucsich N, Weigand AM, Willassen E, Wyler SA,  
701 Bouchez A, Borja A, Čiamporová-Zaťovičová Z, Ferreira S, Dijkstra K-DB, Eisendle U,  
702 Freyhof J, Gadawski P, Graf W, Haegerbaeumer A, van der Hoorn BB, Japoshvili B,  
703 Keresztes L, Keskin E, Leese F, Macher JN, Mamos T, Paz G, Pešić V, Pfannkuchen DM,  
704 Pfannkuchen MA, Price BW, Rinkevich B, Teixeira MAL, Várbíró G, Ekrem T (2019) DNA  
705 barcode reference libraries for the monitoring of aquatic biota in Europe: Gap-analysis and  
706 recommendations for future work. *Science of The Total Environment* 678: 499–524.  
707 <https://doi.org/10.1016/j.scitotenv.2019.04.247>
- 708
- 709

710 **Figures**

711

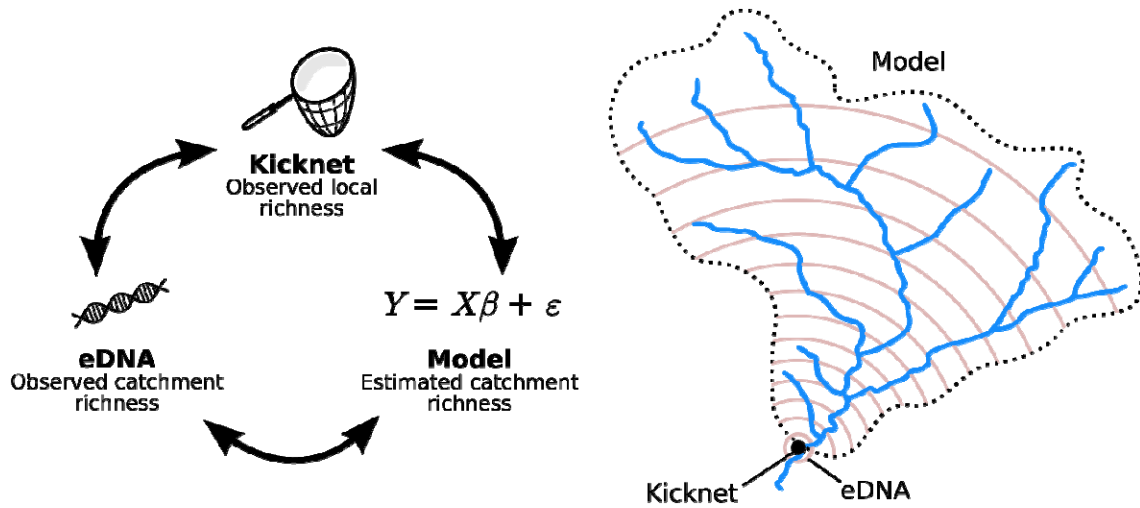

712

713 **Figure 1:** A triad of methods (kicknet sampling, eDNA sampling, and statistical modelling)  
714 available to estimate macroinvertebrate diversity in river ecosystems. Each has its own  
715 specificities, particularly in terms of integrated spatial scale. Note that models always rely on  
716 underlying data used to train them, in this study those are independent kick-net samples.

717

718

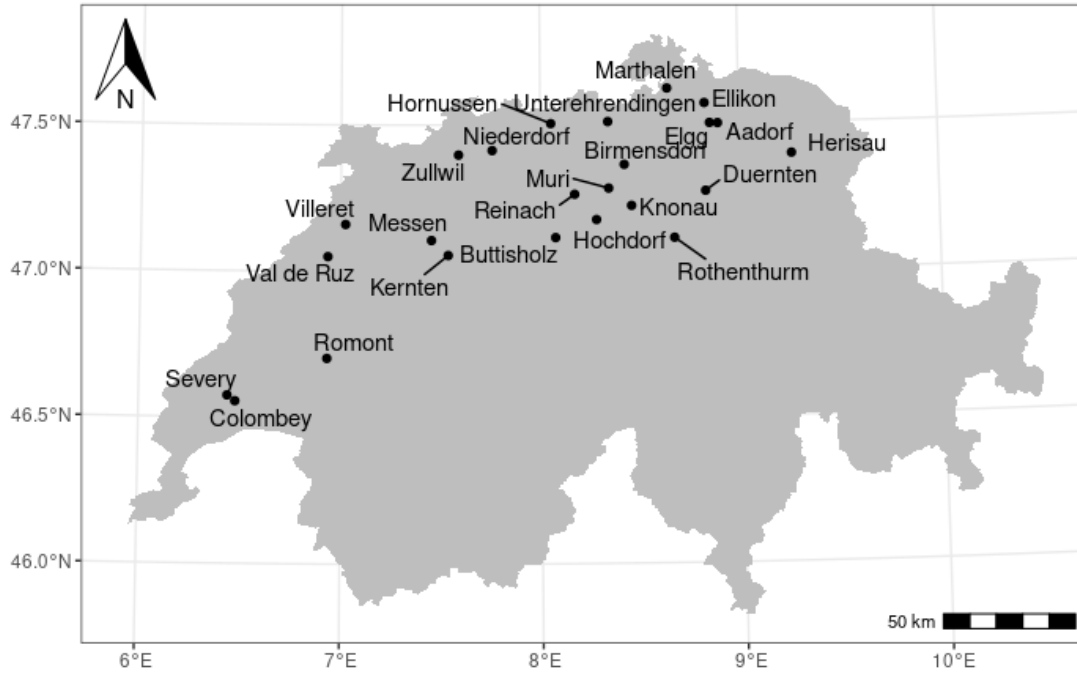

719

720 **Figure 2:** Map of Switzerland showing the 24 sampling locations. Locations are named after  
721 local municipalities.

722



723

724

725

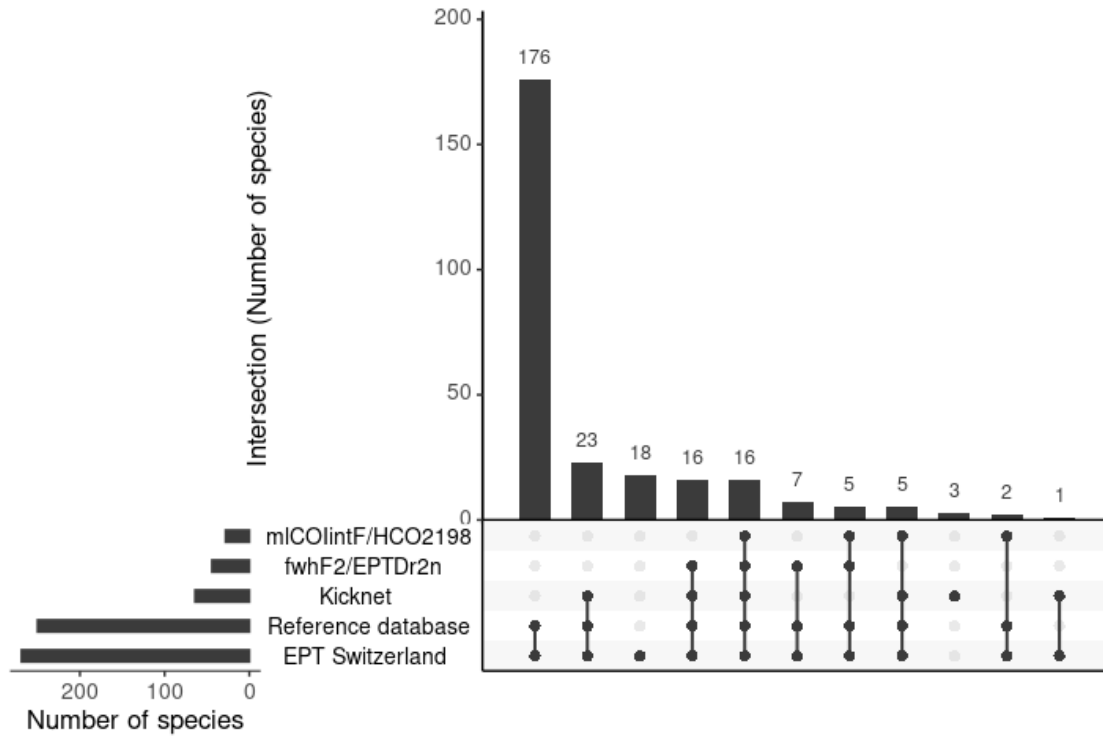

726

727 **Figure 3:** Regional EPT species richness (diversity across all sampling locations) detected  
 728 by eDNA (mICOlintF/HCO2198 and fwhF2/EPTDr2n primers) and kicknet method in  
 729 comparison to total EPT richness known from Switzerland and the subset of species  
 730 included in the molecular reference database. Horizontal bars show the total number of  
 731 species in each set. The vertical bars show the number of species in each intersection  
 732 between sets.

733

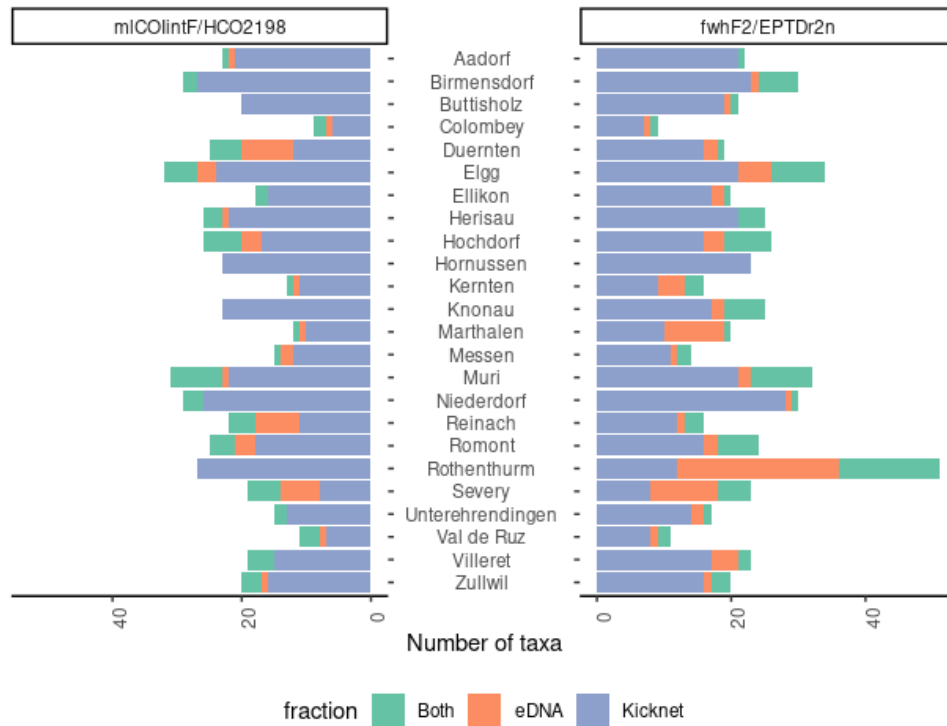

734

735 **Figure 4:** Number of EPT taxa detected in each location by eDNA (miCOLintF/HCO2198 and  
736 fwfF2/EPTDr2n primers) and kicknet methods. The total number of taxa detected is divided  
737 in three fractions (in green the taxa detected by the two methods, in orange the taxa  
738 detected by eDNA only, and in blue the taxa detected by kicknet only, respectively).

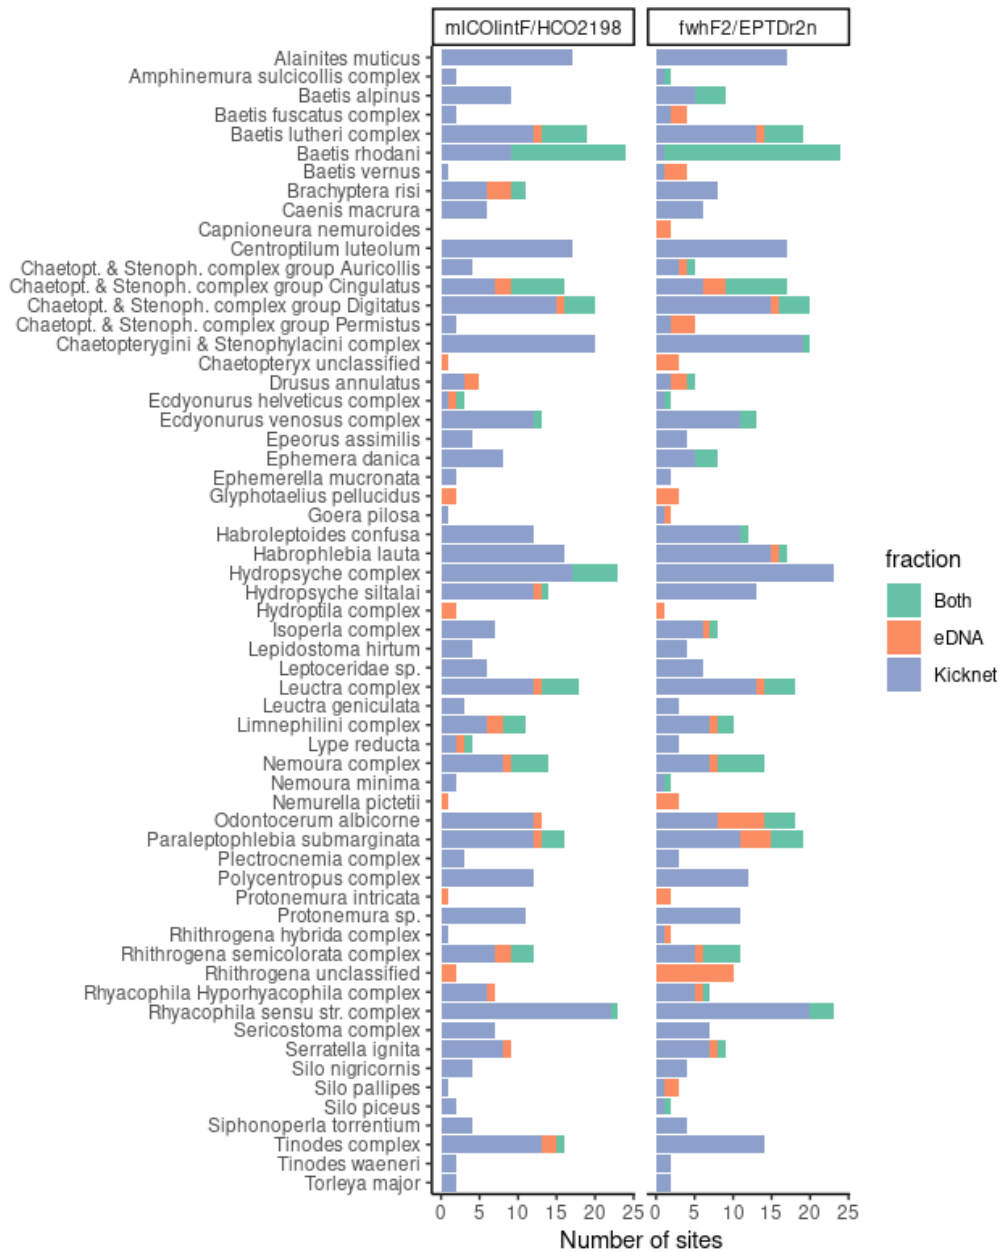

739

740 **Figure 5:** Number of streams where each EPT taxon was detected by eDNA  
 741 (mICOIntF/HCO2198 and fwhF2/EPTDr2n primers) and kicknet methods. The total number  
 742 of locations is divided in three fractions (in green the locations where the taxon was detected  
 743 by the two methods, in orange the locations where the taxon was detected by eDNA only,  
 744 and in blue by kicknet only, respectively). For clarity, only the taxa detected more than once  
 745 (all streams and methods combined) are shown.

746

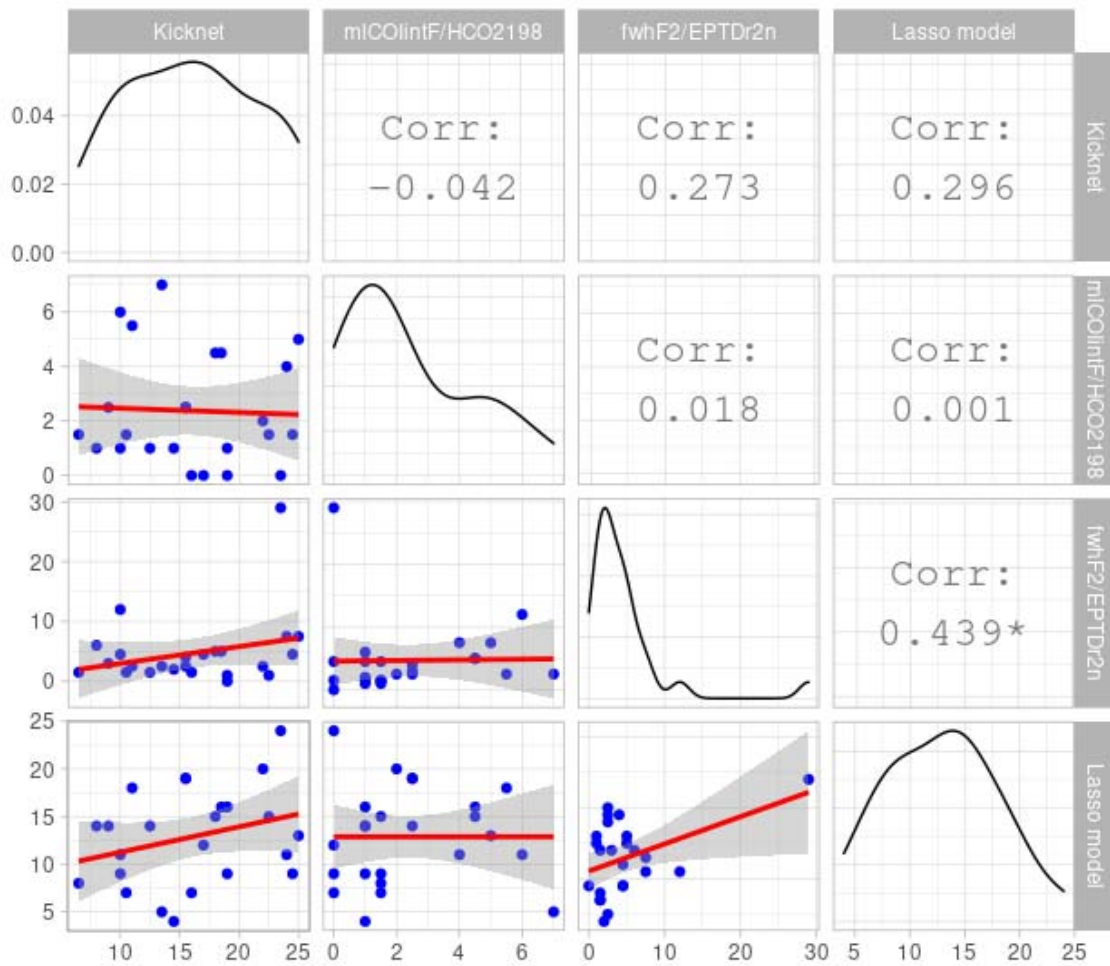

747

748 **Figure 6:** Relationships between the EPT richness estimates provided by the four  
749 investigated methods. The upper triangle provides the correlation values between each  
750 method (star indicates p-value < 0.05). Lower triangle shows the scatterplots with linear  
751 regressions (red lines). The diagonal shows the density estimate for each variable.

752
